# Supplementary material for: Novel Insights into E. coli’s Hexuronate Metabolism: KduI Facilitates the Conversion of Galacturonate and Glucuronate under Osmotic Stress Conditions
Source: PubMed Central journal article supplement (PMC3578941; doi:10.1371/journal.pone.0056906), 2013-02-21
Supplement: pone.0056906.s001.pdf [file pone.0056906.s001.pdf]

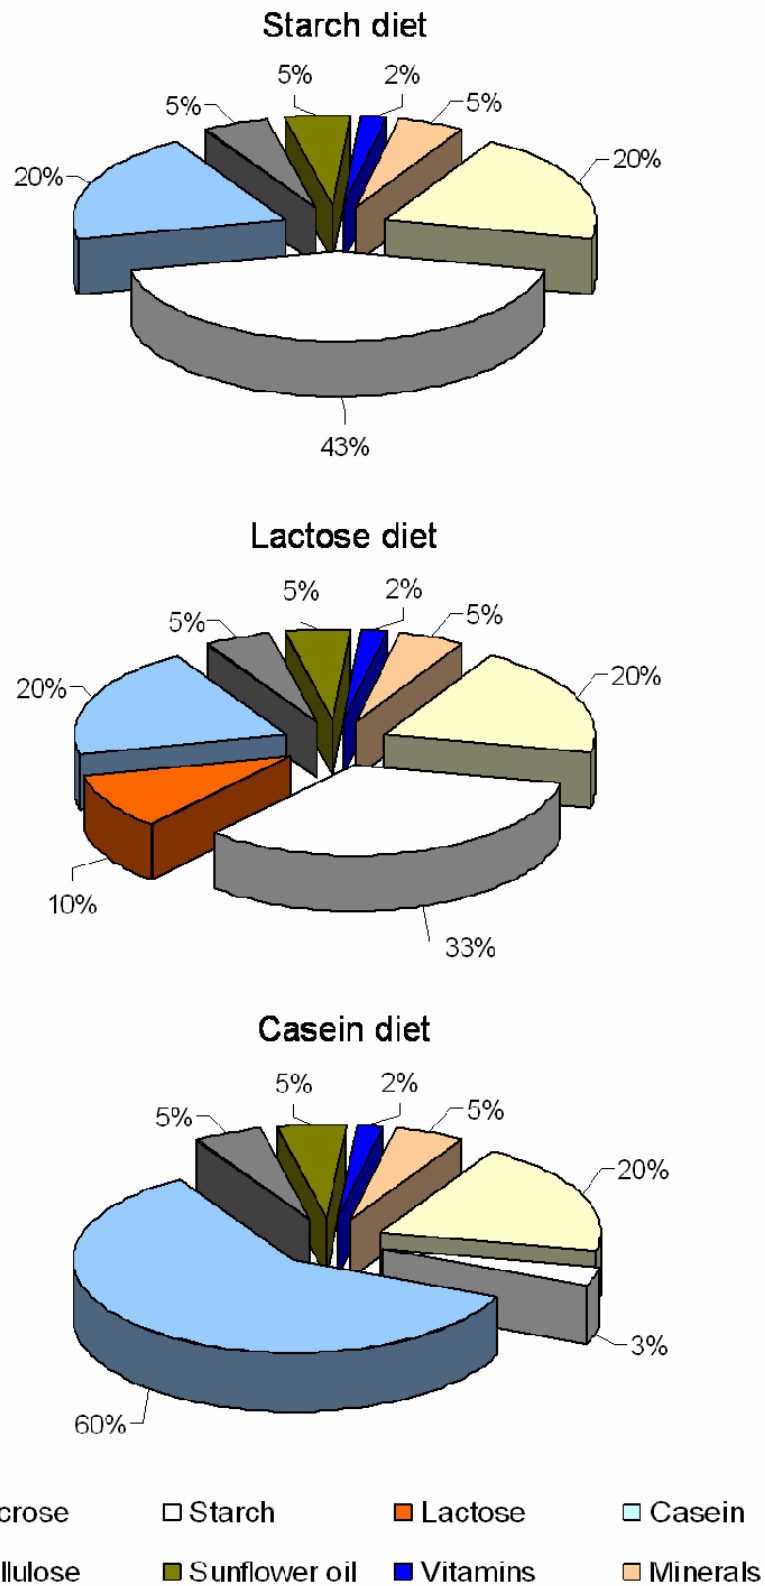

**Figure S1. Composition of the semi-synthetic diets (% w/w).** Gnotobiotic mice monoassociated with *E. coli* MG1655 were fed either the starch (control) diet, the lactose diet, or the casein diet for 3 weeks.
