# Supplementary material for: Novel Insights into E. coli’s Hexuronate Metabolism: KduI Facilitates the Conversion of Galacturonate and Glucuronate under Osmotic Stress Conditions
Source: PubMed Central journal article supplement (PMC3578941; doi:10.1371/journal.pone.0056906), 2013-02-21
Supplement: pone.0056906.s003.pdf [file pone.0056906.s003.pdf]

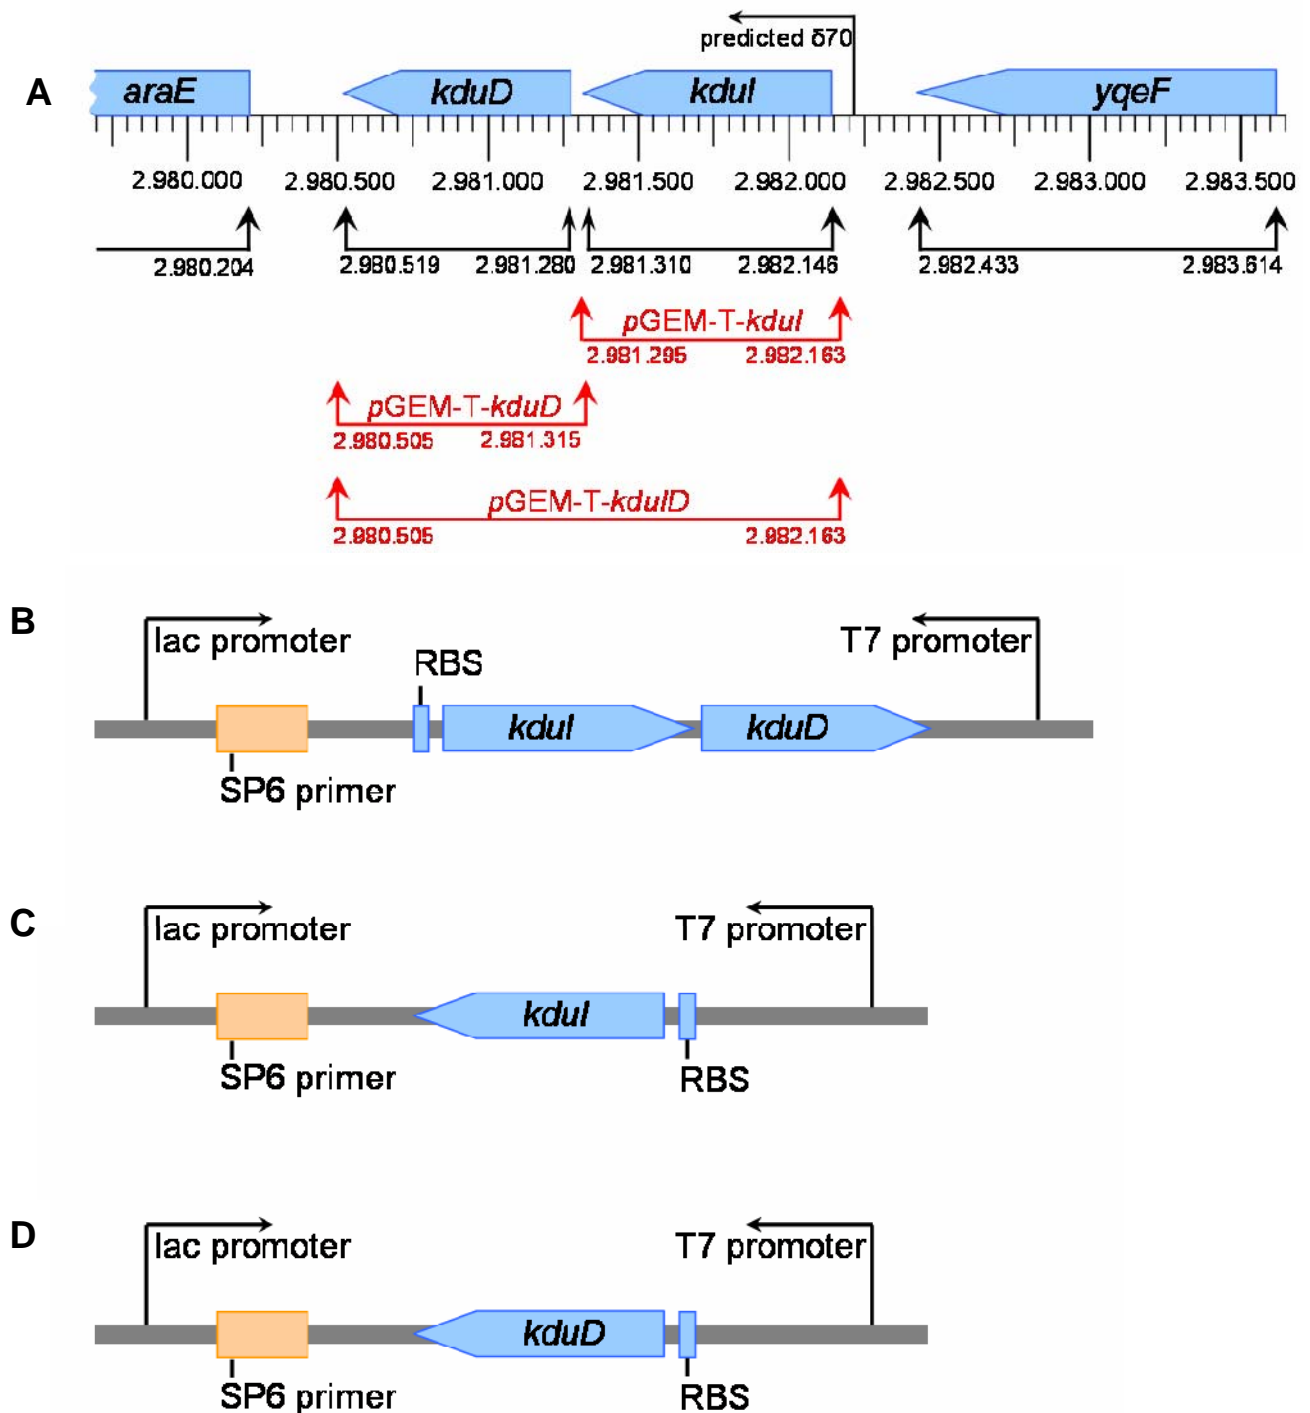

**Figure S3. Schematic presentation of the P-GEM-T constructs carrying *kduI*, *kduD*, or both.** Chromosomal regions coding for *kduI*, *kduD*, or both genes including the ribosomal binding sites (RBS) were amplified from *E. coli* MG1655 and cloned into P-GEM-T vectors (A). Black arrows indicate start and termination sites of genes, red arrows indicate chromosomal sequences cloned in pGEM-T vectors. The orientation of genes was validated by sequencing using plasmid specific primers. Gene expression of clones carrying *kduI* and *kduD* (B) was under the control of the *lac* promoter and therefore inducible by IPTG. Expression of clones carrying *kduI* (C) or *kduD* (D) was controlled by the T7-RNA-polymerase, which is inducible by addition of rhamnose.
