# Supplementary material for: Novel Insights into E. coli’s Hexuronate Metabolism: KduI Facilitates the Conversion of Galacturonate and Glucuronate under Osmotic Stress Conditions
Source: PubMed Central journal article supplement (PMC3578941; doi:10.1371/journal.pone.0056906), 2013-02-21
Supplement: pone.0056906.s004.pdf [file pone.0056906.s004.pdf]

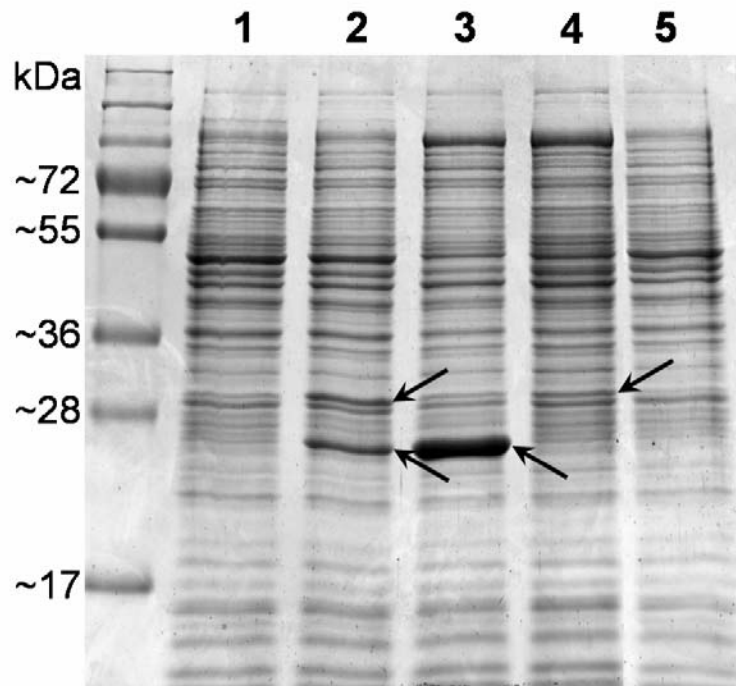

**Figure S4. SDS-PAGE of cell-free extracts from *E. coli* overexpressing Kdul or KduD.** Gene expression of clones carrying *kduI* and *kduD* under the control of the lac promoter (*E. coli* JM109 pGEM-T-*kduID*, lane 2) was induced by addition of IPTG; gene expression of clones carrying either *kduD* (*E. coli* KRX pGEM-T-*kduD*, lane 3) or *kduI* (*E. coli* KRX pGEM-T-*kduI*, lane 4) under the control of the T7-RNA-polymerase was induced by incubation of cells with rhamnose. The empty vector served as negative control (*E. coli* JM109 pGEM-T, lane 1; *E. coli* KRX pGEM-T, lane 5). Per lane 10  $\mu$ g protein were applied. Black arrows indicate the band of the overexpressed proteins.
