# Supplementary material for: Novel Insights into E. coli’s Hexuronate Metabolism: KduI Facilitates the Conversion of Galacturonate and Glucuronate under Osmotic Stress Conditions
Source: PubMed Central journal article supplement (PMC3578941; doi:10.1371/journal.pone.0056906), 2013-02-21
Supplement: pone.0056906.s005.pdf [file pone.0056906.s005.pdf]

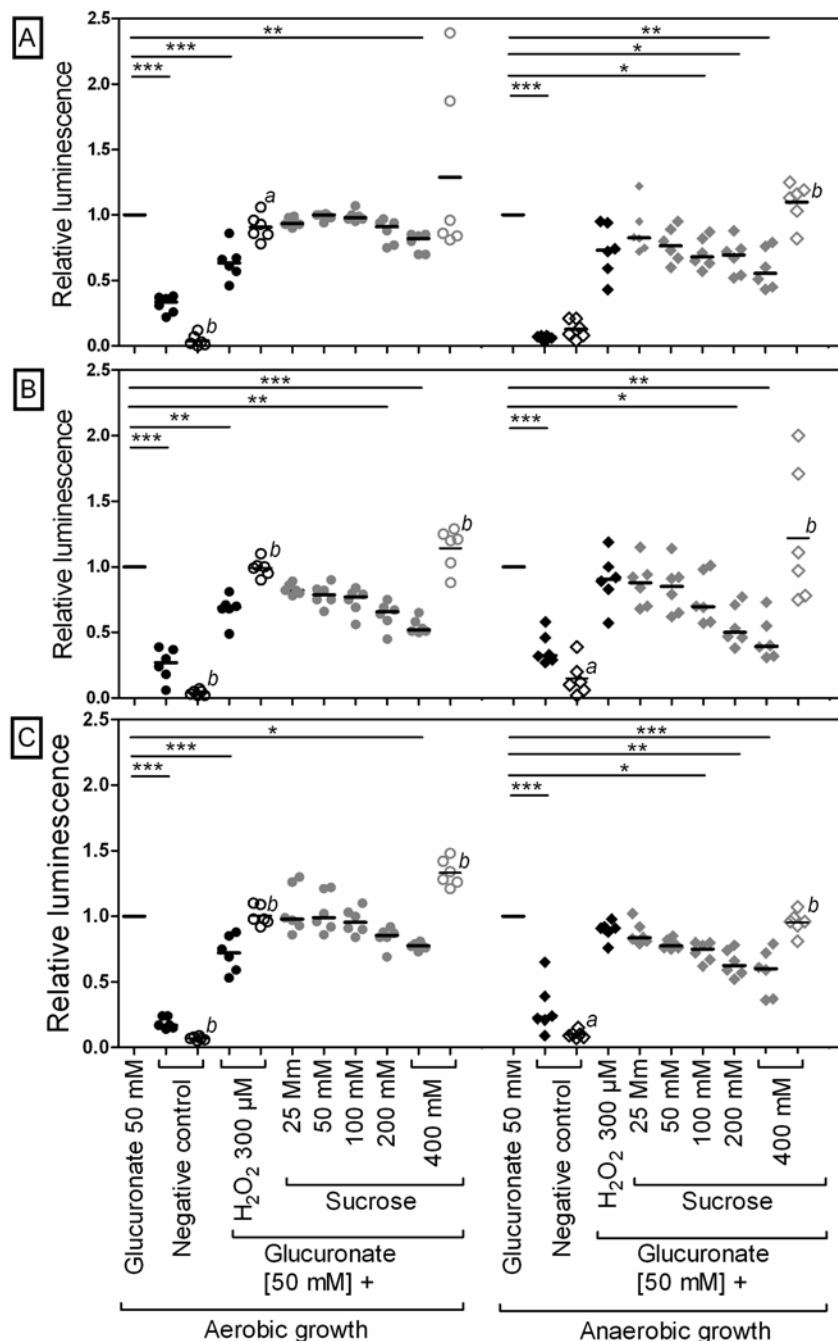

**Figure S5. Repression of gene expression of hexuronate degrading enzymes UxaABC and UxuAB by carbohydrate-induced osmotic stress.** Activity of the *uxaCA*, *uxaB*, and *uxuAB* promoters in *E. coli* MG1655 (filled symbols) and *E. coli*  $\Delta oxyR$  (open symbols) on M9 minimal medium without substrate (negative control), glucuronate, H<sub>2</sub>O<sub>2</sub>, or sucrose under aerobic (left side, circles) or anaerobic (right side, diamonds) conditions after 90 min of incubation was investigated. Relative luminescence data for *E. coli* MG1655 or *E. coli*  $\Delta oxyR$  carrying *puxaCAp::luxAB* (A), *puxaBp::luxAB* (B), or *puxuABp::luxAB* (C) are shown. Luciferase activity was normalized to values determined for cells grown on 50 mM glucuronate. Data are expressed as medians (n = 6). For values obtained from wild type *E. coli*, the Kruskal-Wallis one-way analysis of variance and Dunn's multiple-comparison test were used for calculations. \*, P < 0.05; \*\*, P < 0.01; \*\*\*, P < 0.001. The Mann-Whitney test was applied to compare wild type and mutant strains. a, P < 0.05; b, P < 0.01; c, P < 0.001.
