# Supplementary material for: Novel Insights into E. coli’s Hexuronate Metabolism: KduI Facilitates the Conversion of Galacturonate and Glucuronate under Osmotic Stress Conditions
Source: PubMed Central journal article supplement (PMC3578941; doi:10.1371/journal.pone.0056906), 2013-02-21
Supplement: pone.0056906.s007.pdf [file pone.0056906.s007.pdf]

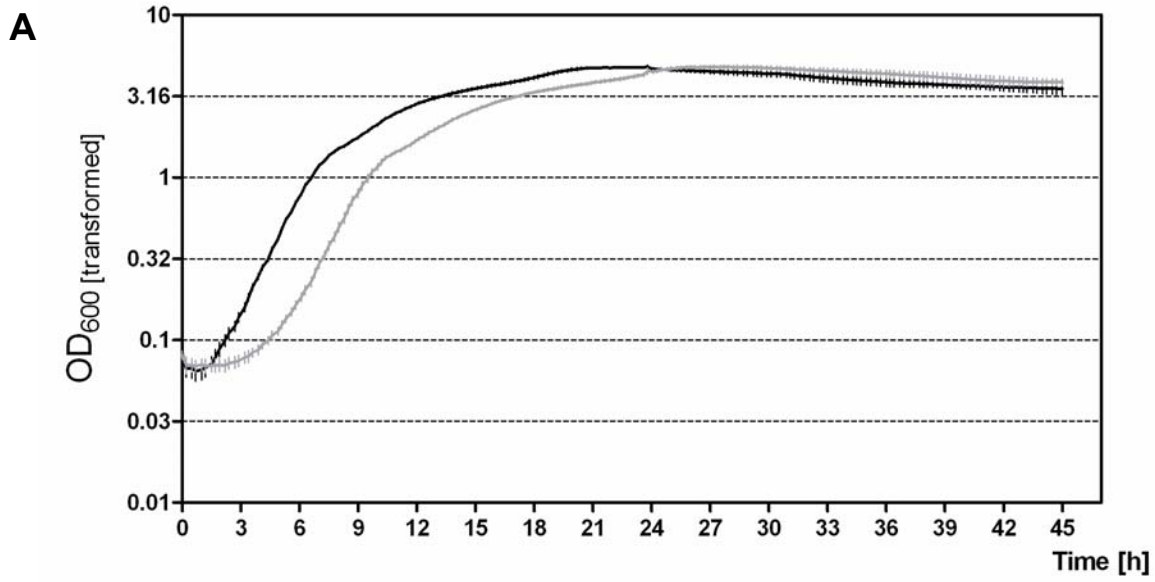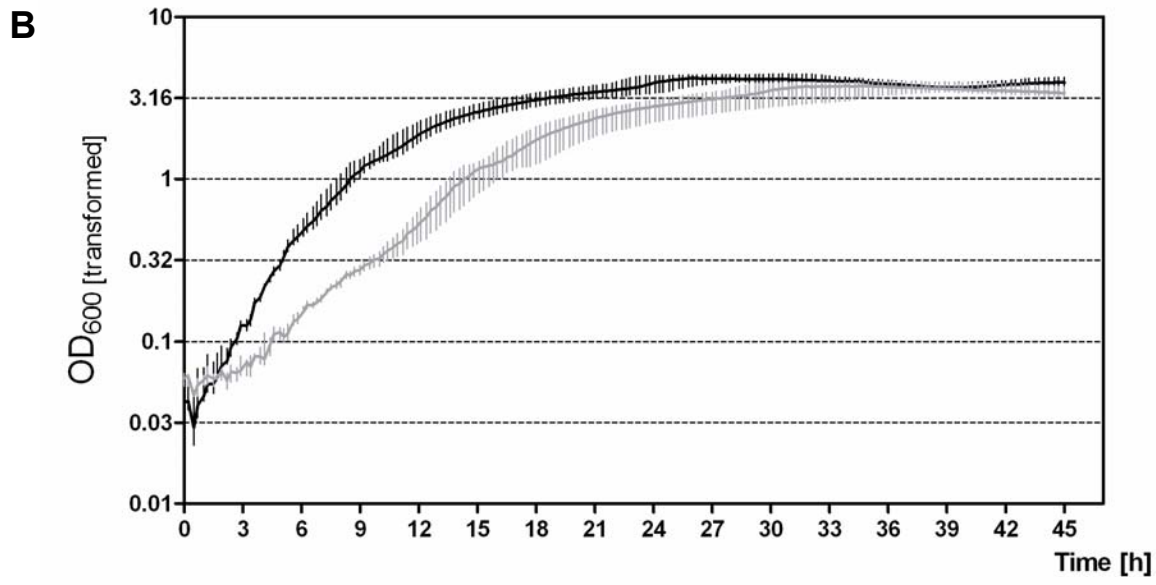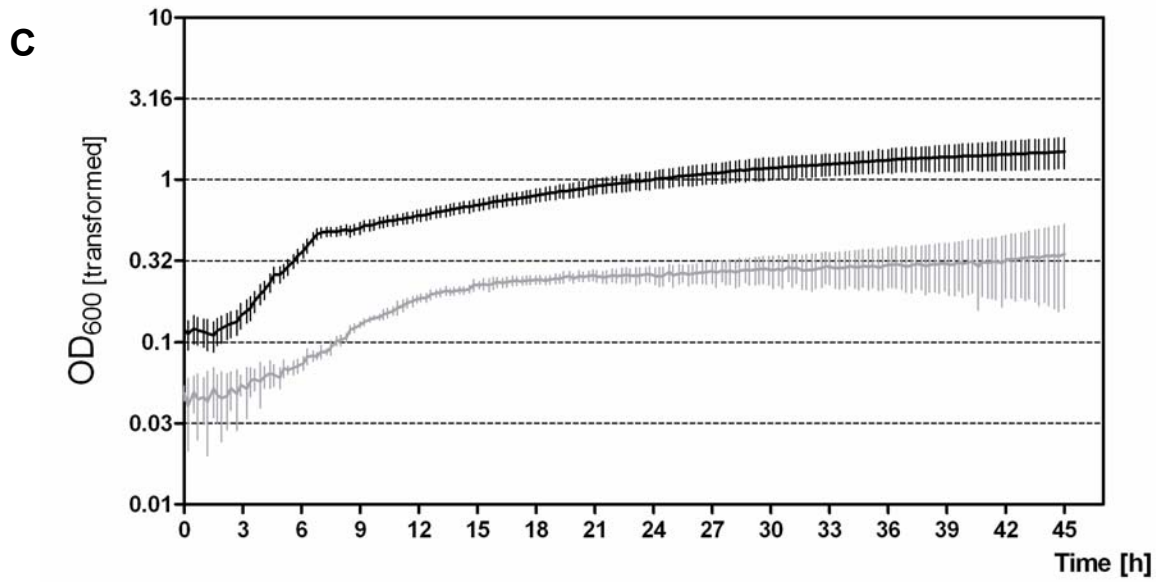

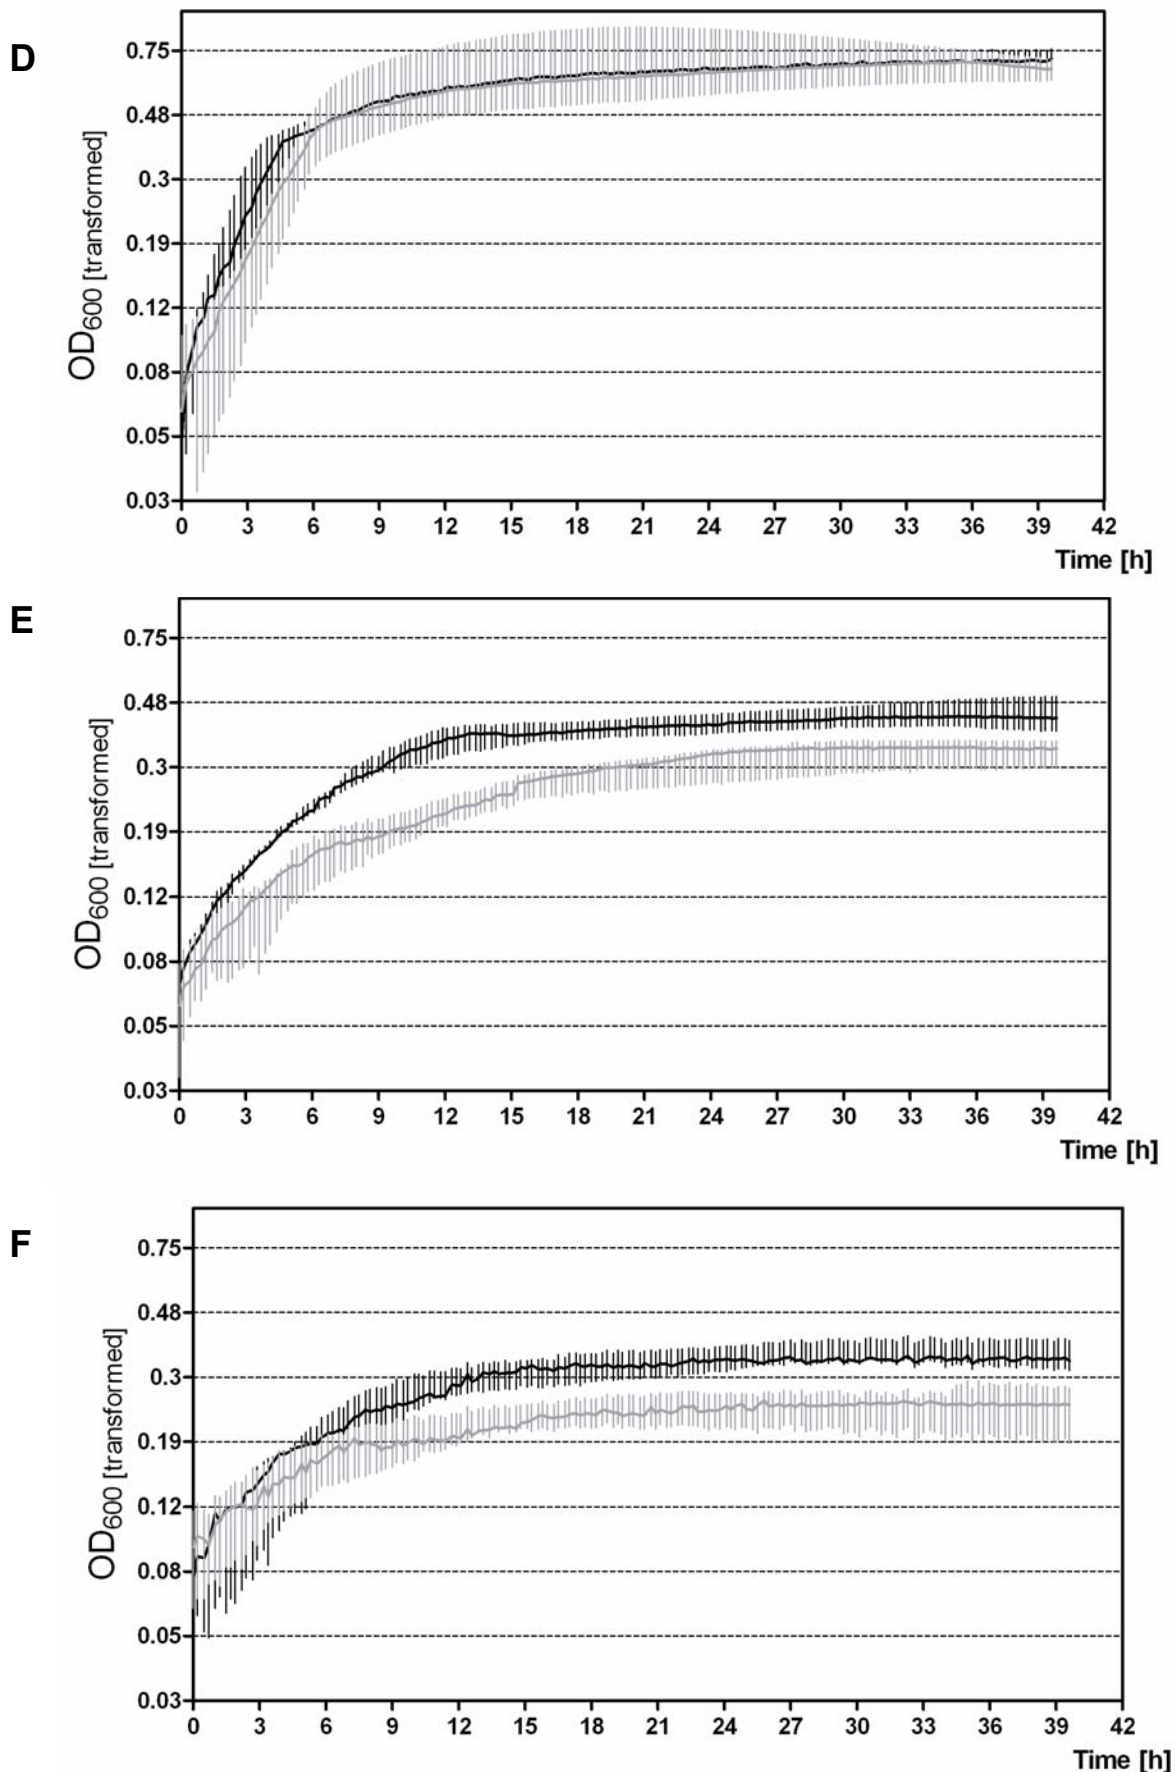

**Figure S7. Diminished growth of *E. coli*  $\Delta kduID$  on glucuronate in the presence of carbohydrate-induced osmotic stress** *E. coli* MG1655 (black line) and *E. coli*  $\Delta kduID$  (gray line) were incubated in M9 minimal medium containing 50mM glucuronate (A, D), 50mM glucuronate and 200 mM sucrose (B, E) or 50mM glucuronate and 400 mM sucrose (C, F). A – C, aerobic conditions, n = 6; D – F, anaerobic conditions, n = 5. Cell densities were determined at 600 nm; data are expressed as medians and minima versus maxima.
