# Supplementary material for: Novel Insights into E. coli’s Hexuronate Metabolism: KduI Facilitates the Conversion of Galacturonate and Glucuronate under Osmotic Stress Conditions
Source: PubMed Central journal article supplement (PMC3578941; doi:10.1371/journal.pone.0056906), 2013-02-21
Supplement: pone.0056906.s008.pdf [file pone.0056906.s008.pdf]

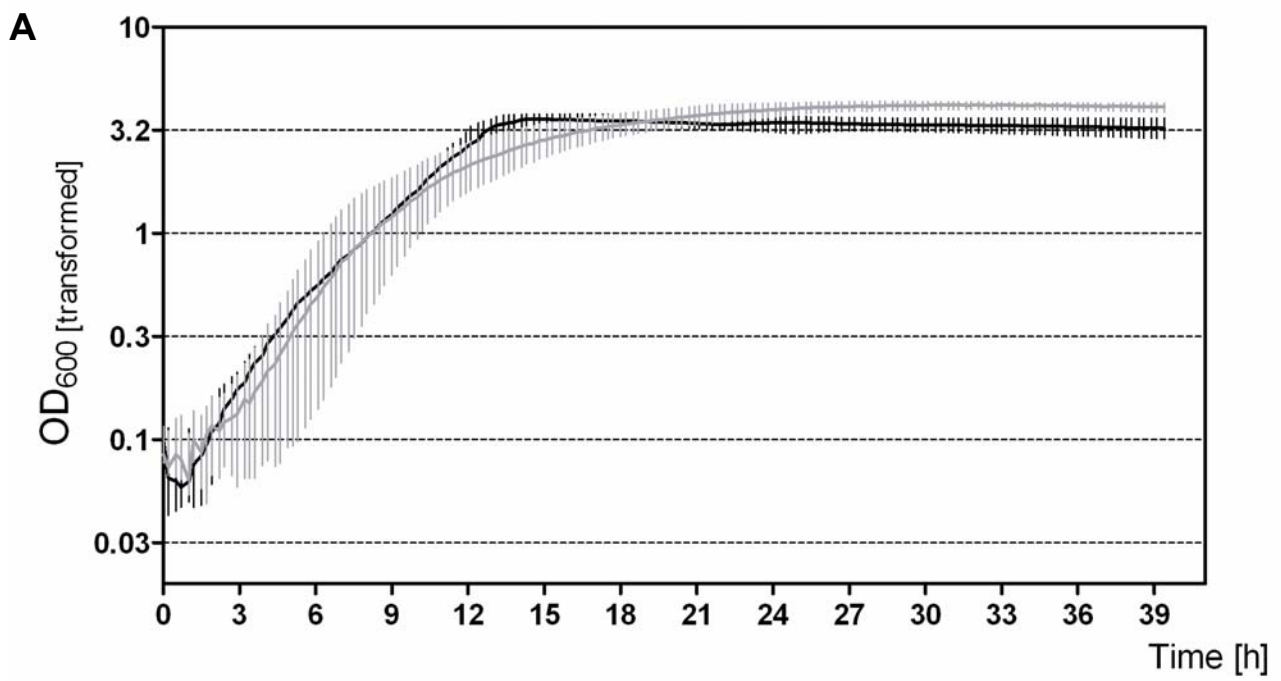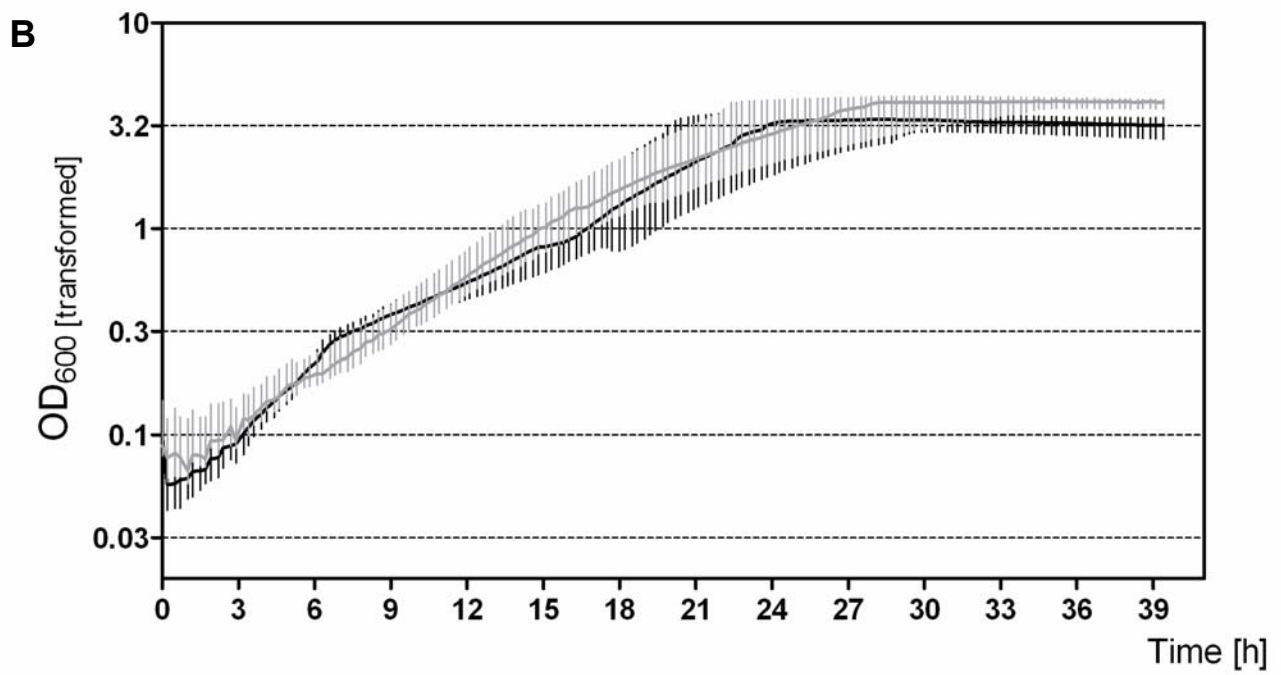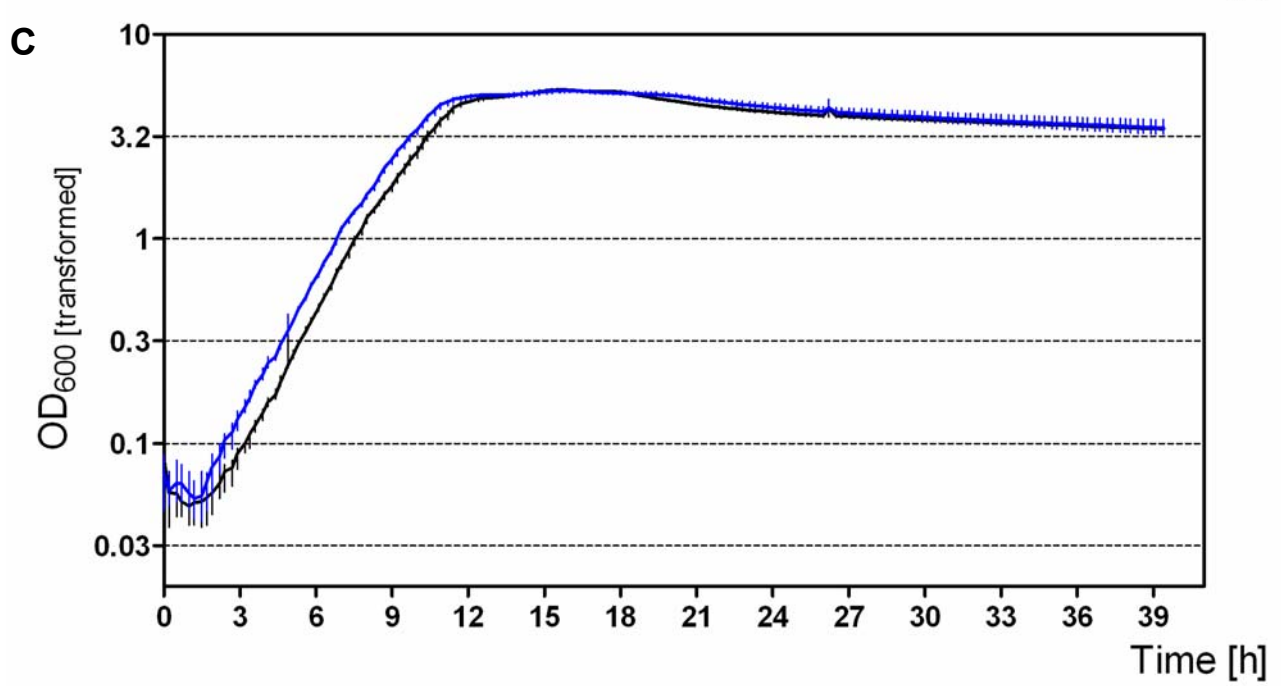

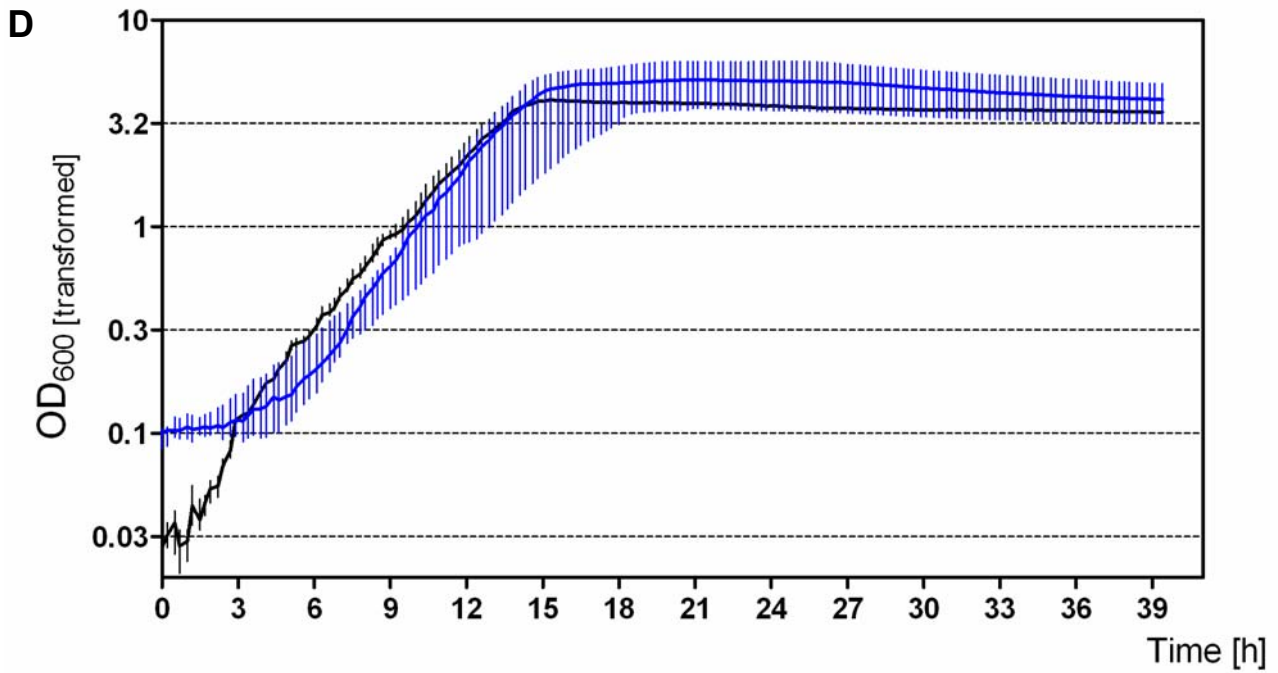

**Figure S8. Restoration of wild type growth behaviour of *E. coli*  $\Delta kduID$  containing complementing plasmids.** *E. coli* pSU19 (black line) and *E. coli*  $\Delta kduID$  pSU19-*kduID* (gray and blue line) were incubated in M9 minimal medium with 50mM glucuronate (A), 50mM glucuronate and 400 mM sucrose (B), 50mM galacturonate (C), or 50 mM galacturonate and 400 mM sucrose (D) under aerobic conditions. Cell densities were determined at 600 nm; data are expressed as medians and minima versus maxima (n = 6).
