# Supplementary material for: Novel Insights into E. coli’s Hexuronate Metabolism: KduI Facilitates the Conversion of Galacturonate and Glucuronate under Osmotic Stress Conditions
Source: PubMed Central journal article supplement (PMC3578941; doi:10.1371/journal.pone.0056906), 2013-02-21
Supplement: pone.0056906.s009.pdf [file pone.0056906.s009.pdf]

**Table S1.** Specific activity of Kdul and KduD, calculated for hexuronate concentrations observed after incubation of cell-free extracts of *E. coli* clones overexpressing *kdul*, *kduD*, or both genes with 10 mM galacturonate or glucuronate over 6 h at 37°C.

| Medium                   | Specific activity after 2 h [nmol/min*mg] <sup>a</sup> |                                             |                                     |                                          |                                          |
|--------------------------|--------------------------------------------------------|---------------------------------------------|-------------------------------------|------------------------------------------|------------------------------------------|
|                          | <i>E. coli</i> jm109<br><i>pGEM-T</i>                  | <i>E. coli</i> jm109<br><i>pGEM-T-kdulD</i> | <i>E. coli</i> KRX<br><i>pGEM-T</i> | <i>E. coli</i> KRX<br><i>pGEM-T-kduD</i> | <i>E. coli</i> KRX<br><i>pGEM-T-kdul</i> |
| Glucuronate<br>[10 mM]   | 1.8 (1.0:2.4)                                          | 5.2 (2.3:6.1) <sup>b</sup>                  | 0.7 (-0.1:2.9)                      | 1.2 (0.3:3.0)                            | 3.7 (2.5:4.9) <sup>b</sup>               |
| Galacturonate<br>[10 mM] | 1.6 (0.6:3.3)                                          | 3.1 (2.4:8.6) <sup>b</sup>                  | 0.8 (-0.2:1.6)                      | 1.3 (0.2:2.6)                            | 4.4 (2.6:8.9) <sup>b</sup>               |

<sup>a</sup> Data are expressed as medians and minima versus maxima (n = 11-12).

<sup>b</sup> Data represent comparisons of the results obtained with *E. coli* JM109 *pGEM-T* vs. *E. coli* JM109 *pGEM-T-kdulD*; *E. coli* KRX *pGEM-T* vs. *E. coli* KRX *pGEM-T-kdul* or *E. coli* KRX *pGEM-T-kduD* (Mann-Whitney test; P < 0.001).
