# Supplementary material for: Novel Insights into E. coli’s Hexuronate Metabolism: KduI Facilitates the Conversion of Galacturonate and Glucuronate under Osmotic Stress Conditions
Source: PubMed Central journal article supplement (PMC3578941; doi:10.1371/journal.pone.0056906), 2013-02-21
Supplement: pone.0056906.s010.pdf [file pone.0056906.s010.pdf]

Table S2: Growth of *E. coli* MG1655 pSU19 and *E. coli*  $\Delta kduID$  pSU19-*kduID* under aerobic conditions: Complementation of *E. coli*  $\Delta kduID$  with plasmids containing the corresponding genes including physiologically relevant promoters restored wild type like behavior.

| Medium <sup>b</sup>             | OD <sub>600</sub> max.      |                                                   | Doubling time t <sub>d</sub> (min <sup>-1</sup> ) |                                                   |
|---------------------------------|-----------------------------|---------------------------------------------------|---------------------------------------------------|---------------------------------------------------|
|                                 | <i>E. coli</i> MG1655 pSU19 | <i>E. coli</i> $\Delta kduID$ pSU19- <i>kduID</i> | <i>E. coli</i> MG1655 pSU19                       | <i>E. coli</i> $\Delta kduID$ pSU19- <i>kduID</i> |
| Glucuronate                     | 3.6 (3.4:3.8)               | 4.2 (4.0:4.4) <sup>c</sup>                        | 89 (75:113)                                       | 82 (80:93)                                        |
| Glucuronate, sucrose [400 mM]   | 3.4 (3.0:3.8)               | 4.2 (3.8:4.4) <sup>c</sup>                        | 218 (183:226)                                     | 237 (195:271)                                     |
| Galacturonate                   | 5.4 (5.3:5.4)               | 5.3 (5.2:5.4)                                     | 78 (74:82)                                        | 82 (75:86)                                        |
| galacturonate, sucrose [400 mM] | 4.1 (4.0:4.3)               | 5.2 (3.7:6.3)                                     | 122 (115:125)                                     | 134 (94:208)                                      |

<sup>a</sup> Data are expressed as medians and minima versus maxima (n = 6).

<sup>b</sup> Cultures were incubated on M9 minimal medium containing glucuronate or galacturonate [50 mM each] with or without 400 mM sucrose.

<sup>c</sup> Data represent comparisons of the results obtained with *E. coli* MG1655 versus *E. coli*  $\Delta kduID$  that included use of the same medium (Mann-Whitney test; P < 0.05).
